# Supplementary material for: Minimizing Errors in RT-PCR Detection and Quantification of SARS-CoV-2 RNA for Wastewater Surveillance
Source: Preprints.org preprint supplement (doi:10.20944/preprints202104.0481.v1), 2021-04-19
Supplement: Supplementary file 1 [file supplementary]

**Supplementary materials**


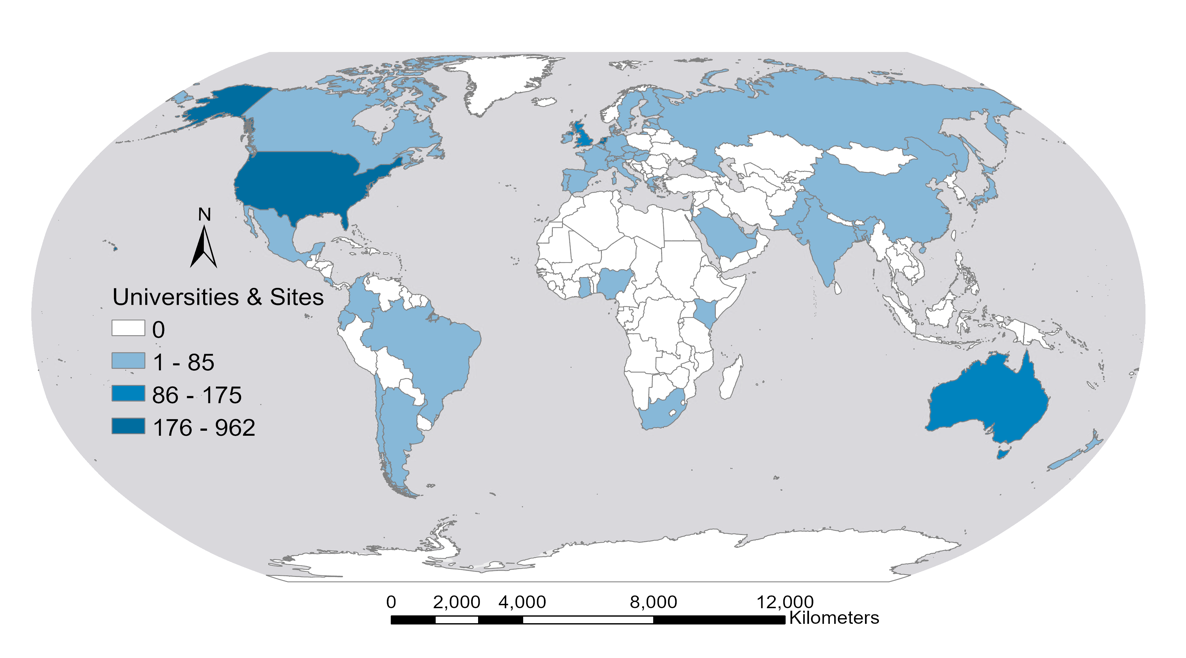


**Supplementary Fig. 1:** Countries that are using wastewater surveillance for SARS-CoV-2 RNA in wastewater.


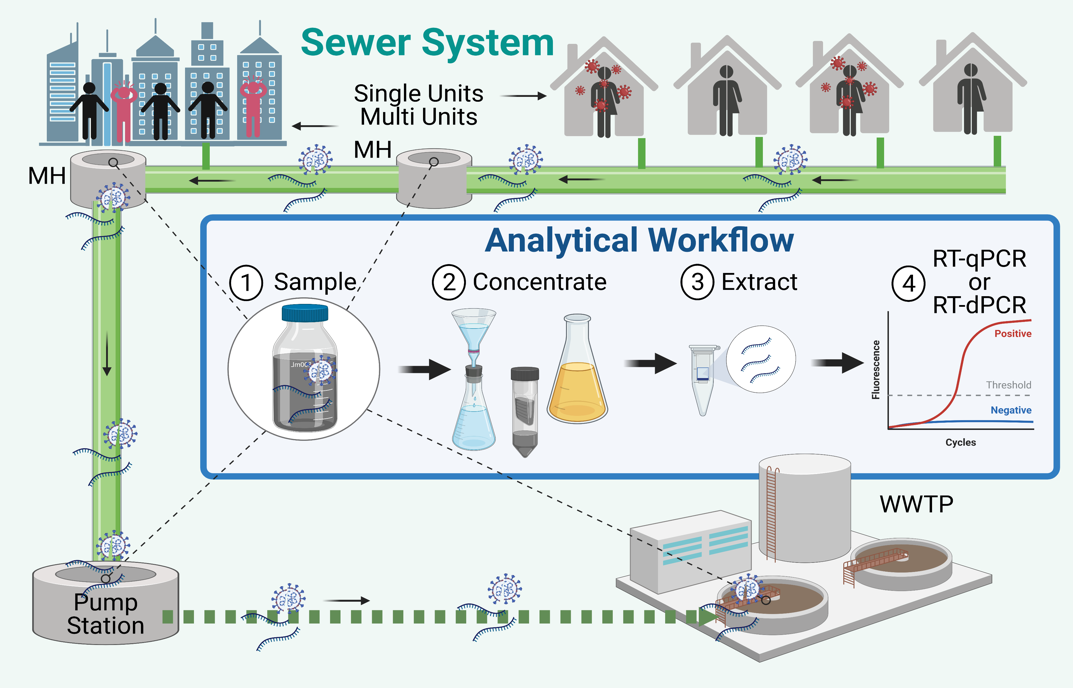


**Supplementary Fig. 2:** A conceptual diagram of a typical sewer catchment with sampling points andanalytical workflow of SARS-CoV-2 RNA surveillance in wastewater. MH: Maintenance hole.

**
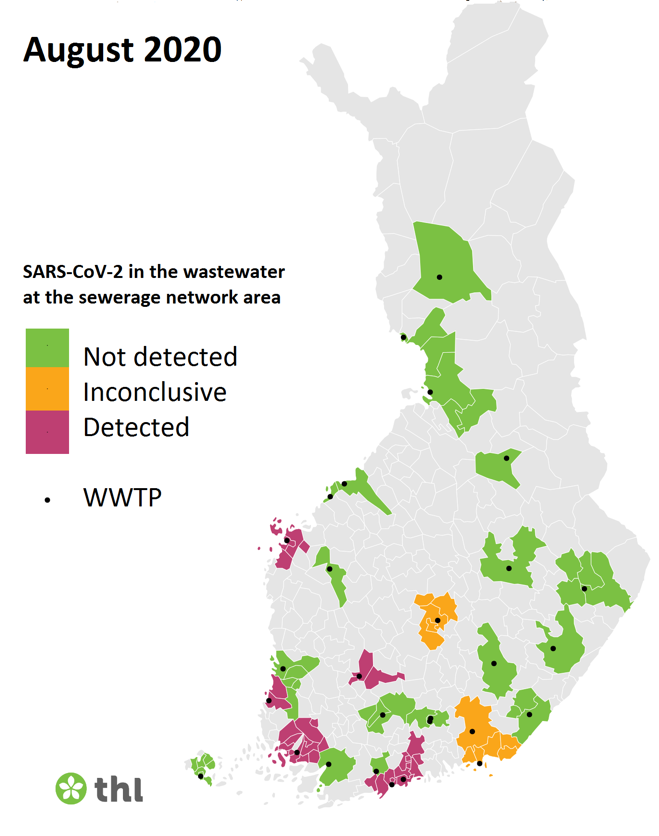
**

**Supplementary Fig. 3:** A weekly report from August 2020 of the national dashboard reporting SARS-CoV-2 RNA surveillance results by using N2 assay at 28 WWTPs in Finland. “Not detected” is denoted when none of the four RT-qPCR replicates exhibit Cq <40. “Inconclusive” means that only one replicate has exhibited Cq <40 (>MLOD but <MLOQ) and the re-run produced non-detection. “Detected” denotes for Cq <40 in more than one replicate of the RT-qPCR reactions/sample. Data from Finnish Institute for Health and Welfare (THL), 2020.
